# Supplementary material
Source: PubMed Central journal article supplement (PMC7341890)
Supplement: NIHMS1544412-supplement-1.pdf [file NIHMS1544412-supplement-1.pdf]

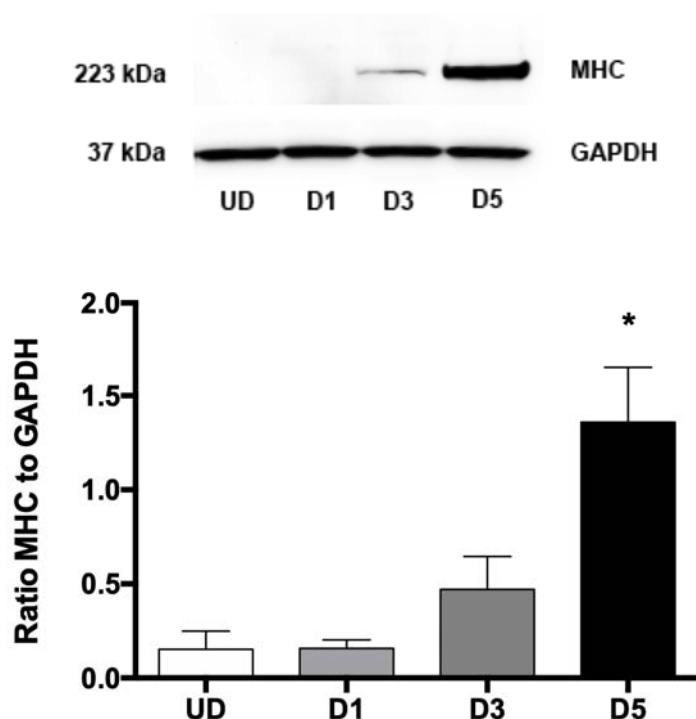

1  
2  
3  
4  
5  
6  
7  
8  
9  
10  
11  
12  
13  
14  
15  
16  
17

**Supplementary Figure 1S. Expression of differentiation markers in myotubes - myosin heavy chains.** Primary human skeletal muscle cells ( $5 \times 10^5$  cells) were plated in a 60-mm dish. Cell lysate was collected before (undifferentiated myoblasts or UD) and 1 (D1), 3 (D3) and 5 (D5) days after differentiation. The expressions of myosin heavy chain (MHC) and GAPDH were measured by western blots. Data are mean  $\pm$  SEM ( $n = 3$ ). \* $P < 0.05$  compared with undifferentiated cells (UD) and tested by ANOVA with Tukey's multiple comparison.

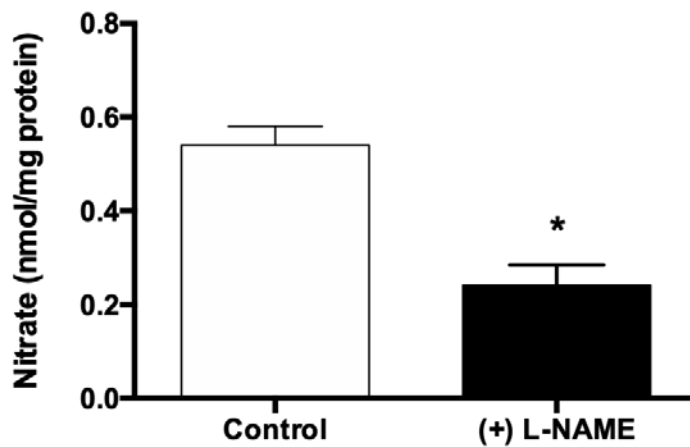

1

2

3 **Supplementary Figure 2S. Effect of NOS inhibition on the basal nitrate levels in**  
4 **myotubes.** L-NAME was added into myotubes cultured in basal media and incubated in  
5 tri-gas incubator at 5% O<sub>2</sub> for 24 hours. After washing with PBS, cell lysates were  
6 collected in lysis buffer. Intracellular nitrate levels were measured by chemiluminescence  
7 and normalized to protein concentration. Data are mean ± SEM (n=4). \**P* < 0.05  
8 compared with control and tested by t-test.
